# Supplementary material for: Batch Fabrication of Microelectrode Arrays with Glassy Carbon Microelectrodes and Interconnections for Neurochemical Sensing: Promises and Challenges
Source: MDPI journal article supplement (doi:10.3390/mi15020277), 2024-02-15
Supplement: s1 [file s1]

# Supplementary Information: Batch fabrication of microelectrode arrays with glassy carbon microelectrodes and interconnections for neurochemical sensing: promises and challenges

Emma-Bernadette A. Faul <sup>1</sup>, Austin M. Broussard <sup>1</sup>, Daniel R. Rivera <sup>1</sup>, May Yoon Pwint <sup>2,3</sup>, Bingchen Wu <sup>2,3</sup>, Qun Cao <sup>2</sup>, Davis Bailey <sup>4</sup>, X. Tracy Cui <sup>2,3,5</sup> and Elisa Castagnola <sup>1,2,\*</sup>

<sup>1</sup> Department of Biomedical Engineering, Louisiana Tech University, Ruston, LA 71272, USA; eaf021@email.latech.edu (E.-B.A.F.); austinbroussard@gmail.com (A.M.B.); drr029@latech.edu (D.R.R.)

<sup>2</sup> Department of Bioengineering, University of Pittsburgh, Pittsburgh, PA 15260, USA; m.pwint@pitt.edu (M.Y.P.); biw15@pitt.edu (B.W.); qc3bs@virginia.edu (Q.C.); xic11@pitt.edu (X.T.C.)

<sup>3</sup> Center for Neural Basis of Cognition, University of Pittsburgh, Pittsburgh, PA 15261, USA

<sup>4</sup> Institute for Micromanufacturing, Louisiana Tech University, Ruston, LA 15213, USA; dbailey@latech.edu

<sup>5</sup> McGowan Institute of Regenerative Medicine, University of Pittsburgh, Pittsburgh, PA 15219-3110, USA

\* Correspondence: elisa@latech.edu

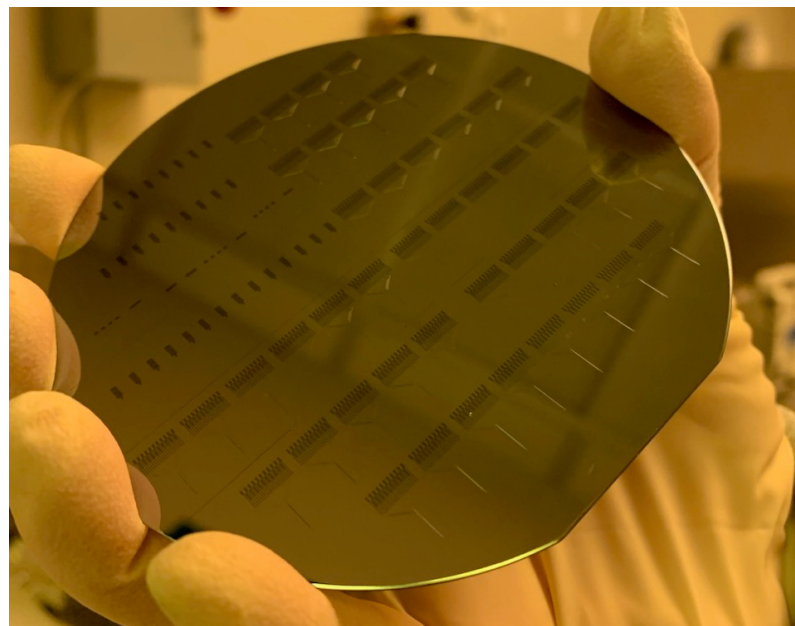

**Figure S1.** GC microelectrode and interconnection on a 4-inch wafer. Different MEA layouts were incorporated into the same photomasks to test different trace spacing (10 to 20  $\mu\text{m}$ ), microelectrode center-to-center distances (100 to 250  $\mu\text{m}$ ), microelectrode shape (30 to 40  $\mu\text{m}$  diameter circular or 55 x 25  $\mu\text{m}$  oval) and microelectrode numbers (5 to 8), shank width (90 to 140  $\mu\text{m}$ ).

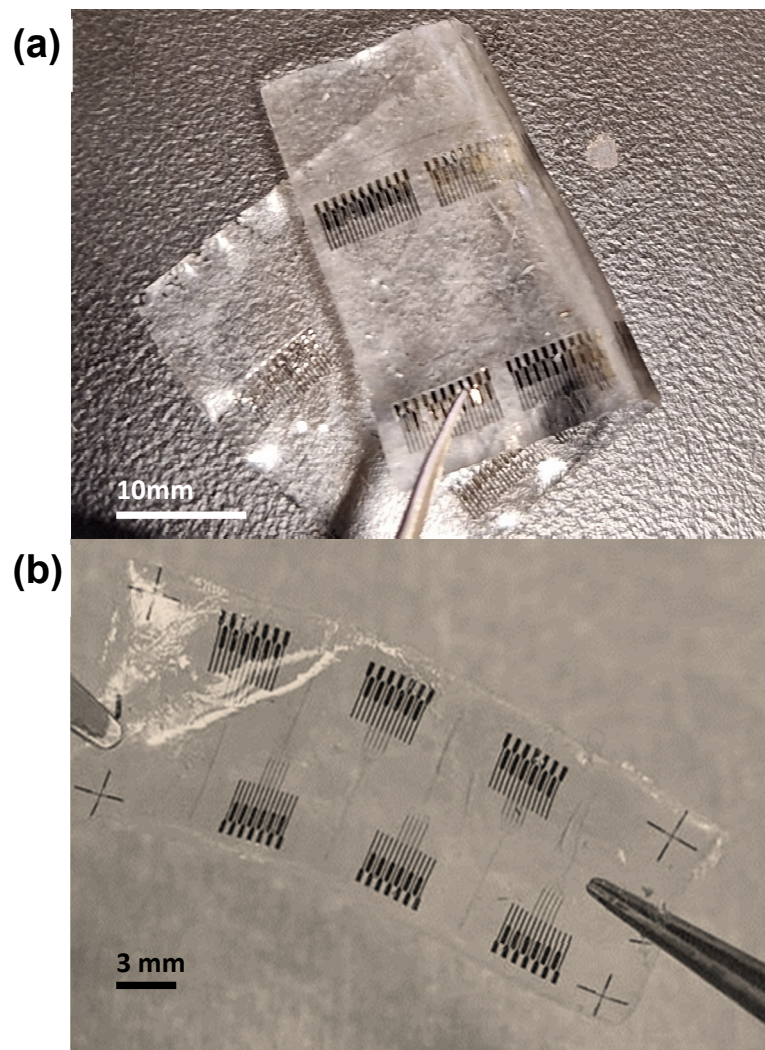

**Figure S2.** Double Pattern Transfer Fabrication: (a, b) optical images of two standalone PDMS layers (300  $\mu\text{m}$  thick) containing the transferred all GC-MEAs, after being released from the  $\text{SiO}_2$  wafer using a chemical buffered oxide etching.
